# Supplementary material
Source: PubMed Central journal article supplement (PMC3021087)
Supplement: 1013914108_pnas.201013914SI.pdf [file 1013914108_pnas.201013914SI.pdf]

# Supporting Information

Li et al. 10.1073/pnas.1013914108

## SI Material and Methods

**Electrophoretic Mobility Shift Assay.** A 10-pM quantity of double-stranded oligonucleotide was end labeled with T4 DNA kinase and 50  $\mu$ Ci [ $\gamma$ - $^{32}$ P] ATP (PerkinElmer). The unincorporated radioactivity was removed through a Sephadex G-25 (Amersham Pharmacia Biotech) spin column. Reactions were carried out in a 20- $\mu$ L volume containing 4  $\mu$ g nuclear extracts, 10 mM Tris-HCl (pH 7.5), 50 mM NaCl, 1 mM MgCl<sub>2</sub>, 0.5 mM DTT, 0.5 mM EDTA, 4% (vol/vol) glycerol, and 1  $\mu$ g poly(dI-dC)·poly(dI-dC). Nuclear proteins were preincubated with 100-fold excess of unlabeled competitor DNA or 3  $\mu$ g antibodies. After 20-min incubation at 4 °C, 0.05 pmol of [ $^{32}$ P] labeled DNA probe

(~10,000 cpm) was added, and the incubation continued for another 30 min at room temperature. The reaction mixture was resolved using a 6% nondenaturing polyacrylamide gel at a constant voltage of 100 V for 90 min at 4 °C. The gel was dried, and the protein-DNA complexes were visualized by PhosphorImager analysis. Oligonucleotides (only sense strands are shown) used to generate the probe and competitor DNA were as follows:

*AaET* JHRE: 5'-ccatcCCACACGCGAAGacgataaaacca-3';  
 Nonspecific competitor: 5'-GATCCGATTAGGATAGCA-TATGCTACCCAGATATA-3'

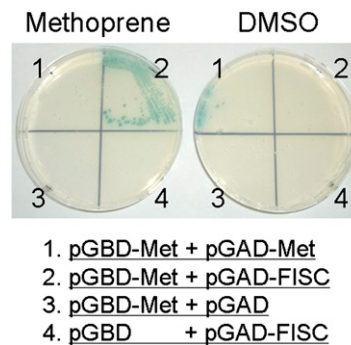

Fig. S1. *AaMet*-*AaFISC* and *AaMet*-*AaMet* interactions detected in yeast two-hybrid assays. The indicated plasmids were cotransformed into AH109 and plated on SD/-Trp/-Leu/-His/-Ade/X-Gal plates containing either 10<sup>-6</sup> M methoprene or DMSO (solvent) only. After ~5 d, blue colonies appeared on the plate.

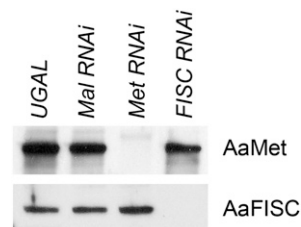

Fig. S2. Depletion of *AaMet* and *AaFISC* in adult mosquitoes by RNAi. Newly emerged adult female mosquitoes were injected with dsRNAs corresponding to *AaMet*, *AaFISC*, or bacterial *MalE* gene. Uninjected (*UGAL*) mosquitoes were also used as control. Then, 4 d after injection, midguts were collected from the mosquitoes. Protein extracts were analyzed by immunoblotting.

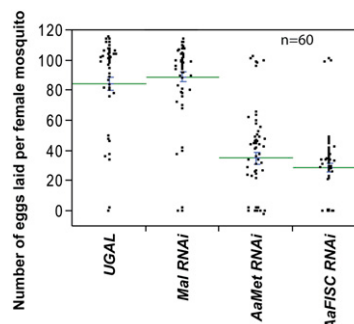

Fig. S3. RNAi-mediated knockdown of *AaMet* and *AaFISC* decreases egg deposition. Newly emerged adult female mosquitoes were injected with dsRNAs corresponding to *AaMet*, *AaFISC* or bacterial *MalE* gene. Dots represent egg counts for individual mosquitoes within 10 d after the first blood meal. Green bars represent median number of eggs oviposited from three replicates; short blue bars indicate SEs. *AaMet*- and *AaFISC*-depleted mosquitoes lay significantly fewer eggs ( $P < 0.001$ ) than *Mal RNAi* mosquitoes and untreated control mosquitoes (*UGAL*). Data were analyzed using JMP8 software.
